# Supplementary material for: The paternal perinatal depression initiative
Source: Royal Society of Chemistry journal article supplement (doi:10.1039/d3tb01397a), 2014-11-01
Supplement: d3tb01397a1.pdf [file d3tb01397a1.pdf]

## **Galactomannan-*graft*-poly(methyl methacrylate) nanoparticles induce an anti-inflammatory phenotype in human macrophages**

Alejandro Sosnik<sup>1,\*</sup>, Ivan Zlotver<sup>1</sup> and Ella Peled<sup>1</sup>

<sup>1</sup> Laboratory of Pharmaceutical Nanomaterials Science, Department of Materials Science and Engineering, Technion-Israel Institute of Technology, 3200003 Haifa, Israel

\*Corresponding author: Prof. Alejandro Sosnik, Department of Materials Science and Engineering, Technion-Israel Institute of Technology, De-Jur Building, Office 607, Technion City, 3200003 Haifa, Israel; Phone #: +972-77-887-1971; Emails: [sosnik@technion.ac.il](mailto:sosnik@technion.ac.il), [alesosnik@gmail.com](mailto:alesosnik@gmail.com)

### **Methods**

#### **Materials**

GM (from locust bean gum) was supplied by Glentham Life Sciences (Corsham, UK) and hydrolyzed in trifluoroacetic acid (1M, TFA, Fluka, Buchs, Switzerland) at 80 °C for 1 h to produce hGM and dialyzed against distilled water (regenerated cellulose dialysis membranes; molecular weight cut off 3500 Da; nominal flat width of 46 mm, diameter of 29.3 mm, wall thickness; Cellu-Sep, Membrane Filtration Products, Inc., Membrane Filtration Products, Inc., Seguin, TX, USA). Methyl methacrylate (MMA, Alfa Aesar, Heysham, UK) was distilled under vacuum at 35–40 °C to remove the radical inhibitor. Cerium(IV) ammonium nitrate (CAN, Sigma-Aldrich, St. Louis, MO, USA), nitric acid 70% (Bio-Lab Ltd., Jerusalem, Israel) and tetramethylethylenediamine (TEMED, Alfa Aesar) were used without further purification. All the solvents were of spectroscopic or analytical grade, purchased from Bio-Lab Ltd. or Gadot (Netanya, Israel), and used without additional purification. Dimethylformamide (DMF) and dimethyl sulfoxide (DMSO) were supplied by Carlo Erba Reagents (Val de Reuil, France) and dried with activated molecular sieves 3A (Sigma-Aldrich) for at least 48 h before use.

#### **Synthesis and characterization of hGM-*g*-PMMA nanoparticles**

The grafting of MMA blocks on the backbone of hGM to produce a graft copolymer containing 30% w/w of PMMA (hGM-*g*-PMMA30) was conducted by the free radical graft polymerization of MMA in nitric acid solution in water by utilizing CAN as initiator and TEMED as activator, as described elsewhere [1,2]. Briefly, hGM (0.4 g)

was dissolved in 150 mL of a nitric acid aqueous solution (0.05 M) and mixed with 180  $\mu$ L of TEMED and 213  $\mu$ L of MMA. The mixture was degassed and purged with N<sub>2</sub> gas to remove oxygen. The reaction was initiated by adding CAN solution (0.66 g in 2 mL degassed water) and allowed to proceed at 35°C under N<sub>2</sub> atmosphere for 3 h. The reaction was terminated by adding hydroquinone powder (0.132 g) to produce a hGM-g-PMMA30 copolymer. For biological assays, the copolymer was labeled with fluorescein isothiocyanate (FITC, Sigma-Aldrich) to obtain fluorescently-labeled hGM-g-PMMA30 copolymer. For this, hGM-g-PMMA30 copolymer (0.1 g) was dissolved in DMF (2 mL). FITC (10 mg in 200  $\mu$ L dry DMF) was added to the copolymer solution, and the reaction was allowed to proceed for 16 h at 32 °C under stirring. The reaction crude was dialyzed and freeze-dried (Labconco Free Zone 4.5 plus, Labconco, Corp., Kansas City, MO, USA) and stored at 4 °C until use. The percentage of PMMA in the copolymer (expressed as % w/w) was quantified by proton-nuclear magnetic resonance (<sup>1</sup>H-NMR) in a 400 MHz Bruker Avance III 400 spectrometer (Bruker BioSpin GmbH, Rheinstetten, Germany). Data were analyzed with MestReNova software (Mestrelab Research, Santiago de Compostela, Spain). Solutions (5% w/v) were prepared in dimethyl sulfoxide (DMSO)-*d*<sub>6</sub> (D content of 99.9%, Cambridge Isotope Laboratories, Inc., Tewksbury, MA, USA). Chemical shifts were established in ppm, setting the signal of DMSO (2.5 ppm) as the internal standard. NP suspensions were prepared by direct dissolution of the copolymer at the desired concentration and medium. Fluorescently-labeled NPs were produced by direct dissolution of 85% and 15% w/w of unlabeled and FITC-labeled copolymer.

The size of hGM-g-PMMA30 NPs expressed as hydrodynamic diameter ( $D_h$ ) and the polydispersity index (PDI, an estimation of the size distribution) were measured by dynamic light scattering (DLS) in a Zetasizer Nano-ZS (Malvern Instruments, Malvern, UK) at a scattering angle of 173° and, 25 and 37 °C by utilizing 0.1% w/v samples. Data was analyzed using CONTIN algorithms (Malvern Instruments). Each value is expressed as mean  $\pm$  S.D. of at least three independent samples and each measurement is an average of at least seven runs. For physical stability studies, samples were prepared in different media, stored at 25 or -20 °C and the  $D_h$  and the PDI measured by DLS at different time points.

#### **Nanoparticle compatibility and uptake in a human macrophage cell line**

The human monocyte cell line THP-1 (ATCC® TIB-202™, American Type Culture Collection, Manassas, VA, USA) was generously donated by Dr. David Meiri (Faculty

of Biology, Technion – Israel Institute of Technology) and cultured in RPMI-1640 (Life Technologies Corp., Carlsbad, CA, USA) supplemented with L-glutamine, 10% heat-inactivated fetal bovine serum (FBS, Sigma-Aldrich) and a penicillin/streptomycin antibiotic mixture (5 mL of a commercial mixture of 100 U/mL penicillin + 100 µg/mL streptomycin per 500 mL medium, Sigma-Aldrich) at 37 °C and humidified 5% CO<sub>2</sub>. Cells were split every 3-4 days and maintained at a cell density up to 1.5 x 10<sup>6</sup> viable cells/mL.

To evaluate the compatibility of the NPs, THP-1 monocytes were initially differentiated into macrophages. For this, cells were cultured in 96-well plates (20 x 10<sup>3</sup> cells/well). Next, phorbol 12-myristate 13-acetate (PMA, Sigma-Aldrich) was added at a concentration of 50 ng/mL in a serum-free RPMI-1640 medium and cells allowed to attach to the surface for 48 h at 37 °C and 5% CO<sub>2</sub>. After 24 h, the cells were washed twice with PBS, and the medium was replaced with RPMI-1640 containing 10% FBS for further analysis. Then, the medium was replaced by fresh medium containing 10% FBS, and the sterile NPs sample (1% w/v in PBS of pH 7.4, Sigma-Aldrich) was added to a final NP concentration of 0.01%-0.1% w/v. For these assays, hGM-g-PMMA30 NPs were sterilized by filtration (sterile 0.22 µm syringe filters, Merck Millipore Ltd., Cork, Ireland) under the biological hood. After 24-72 h incubation, the medium was replaced by new medium (100 µL) and sterile 3-(4,5 dimethylthiazol-2-yl)-2,5-diphenyltetrazolium bromide (MTT, 25 µL, 5 mg/mL, Sigma-Aldrich) was added. Following 4 h incubation at 37 °C and 5% CO<sub>2</sub>, formazan crystals were dissolved in 100 µL DMSO and the absorbance measured at 530 nm (with reference to the absorbance at 670 nm) in a spectrophotometer (Multiskan GO™, Thermo Fisher Scientific Oy, Vantaa, Finland). Cells treated only with culture medium were considered as 100% viable.

THP-1 cell uptake of 0.1% w/v NPs in PBS at 37 °C was characterized by confocal laser scanning microscopy (CLSM). For this, THP-1-derived macrophages were cultured with 0.4 mL of RPMI-1640 medium containing FITC-labeled NPs (0.1% w/v in PBS) or without NPs (control) in an 8-well chamber (60 x 10<sup>3</sup> cells/well) with a glass bottom (Ibidi, Gräfelfing, Germany). Cells were incubated for 1 and 24 h at 37 °C and for 1 h at 4 °C. Subsequently, the medium was removed, and the cells were washed twice with PBS and Hoechst 33342 (0.2 µg/mL, Sigma-Aldrich) in RPMI-1640 was added. Then, samples were visualized under a CLSFM LSM 700 (Carl Zeiss Inc., Oberkochen, Germany).

NP uptake by THP-1 cells was quantified by imaging flow cytometry. For this, THP-1-derived macrophages were cultured with 1.5 mL of RPMI-1640 medium containing FITC-labeled NPs (0.1% w/v in PBS) or without NPs (control). The cells were subjected to incubation at 37 °C for 1 and 24 h. Following this, the medium was removed, and the cells were washed twice with PBS. The cells were harvested using a sterile plastic scraper, centrifuged at 250g for 5 min, and resuspended in 30 µL of culture medium. To quantify cell uptake, live cells were analyzed using an Amnis® ImageStream®X Mark II imaging flow cytometer (Luminex, Corp., Austin, TX, USA) equipped with 405, 488, 560, and 642 nm lasers, at a magnification of 40×. The instrument was calibrated using SpeedBeads™ (GE Healthcare, Chicago, IL, USA). In each experiment, 5000 events per sample were acquired. The acquired images were analyzed with IDEAS® analysis Software (Luminex, Corp.). We employed a four-step gating technique to identify exclusively the living cells that had taken up the NPs [2]. Initially, we utilized a gradient root mean square analysis on the image sharpness histogram to identify the cells that were in focus. Next, we used a scatter plot of aspect ratio/area to filter for single cells. Then, we applied the Haralick texture feature to eliminate the non-living cells. Lastly, we performed image analysis on the remaining living, single cells that were in focus to determine the presence of NPs in the cytosol and to rule out NPs that underwent adsorption onto the cell membrane. To achieve this, we used masks that exclude the membrane region. The percentage of cells that had taken up NPs (%Uptake) was calculated by averaging at least three separate experiments using Equation 1

$$\%Uptake = \frac{S_{NP}}{Total\ cells} \times 100 \quad (1)$$

Where  $S_{NP}$  is the number FITC-positive THP-1 cells out of the Total cells.

### **Total RNA-sequencing and data processing**

To investigate the effect of hGM-g-PMMA30 NPs on THP-1 gene expression, we conducted RNA-seq analysis. In this study, THP-1-derived macrophages were cultured in 6-well plates ( $1.5 \times 10^6$  cells/well) with either sterile hGM-g-PMMA30 NPs (at a concentration of 0.1% w/v in PBS) or without (control). The cells were incubated for 24 h at 37 °C, and the experiments were performed in quadruplicate (n = 4 for each experimental group). After removing the cell medium, the cells were washed with PBS,

and TRIzol (700  $\mu$ L, Invitrogen, Carlsbad, CA, USA) was added to each well. The RNA was extracted according to the manufacturer's protocol and stored at -80 °C until further use. RNA sequencing was performed using the CEL-seq method on an Illumina HiSeq 2500 (Illumina, Inc., San Diego, CA, USA) at the "Technion Genome Center". Quality control was performed using FASTQC (version 0.11.5, Babraham Bioinformatics, The Babraham Institute, Cambridge, UK), and the reads were mapped to the genome assembly using the Tophat2 version 2.1.0 algorithm [3]. The reads were counted using HTseq-count version 0.11.2 [4], and the raw counts were normalized and analyzed for differential expression using DESeq2 in the R platform version 1.24.0 [5], with Padj values calculated using the Benjamini and Hochberg correction for false discovery.

### **Bioinformatics analysis of RNA-seq data**

The DESEQ2 package in the R platform was used to generate a 2D principal component analysis (PCA) plot, which visualizes the samples based on their first two principal components [5]. To evaluate pathway enrichment in the RNA-seq data, gene set enrichment analysis (GSEA) was employed on all genes ranked by their fragments per kilobase of exon per million (FPKM) values in the RNA-seq data (<http://www.gsea-msigdb.org/gsea/login.jsp>; version 4.3.2) [6]. The Hallmarks (h.all.v2022.1.Hs.symbols.gmt) and c2.KEGG (c2.cp.kegg.v2022.1.Hs.symbols.gmt) gene set collections from the Molecular Signature Database (MSigDB) [7,8] were investigated in this study. To map Ensemble IDs to gene symbols for all genes in the MSigDB collection, the Array Annotations database (Human\_Ensembl\_Gene\_ID\_MSigDB.v2022.1.Hs.chip) was used. The false discovery rate (FDR) < 0.25 and normal  $p$  < 0.05 were set as significant cutoff values.

### **Gene expression**

To study the expression of key genes, we conducted real time-quantitative polymerase chain reaction (RT-qPCR) analysis. For this, THP-1-derived macrophages were grown in 6-well plates ( $1.5 \times 10^6$  cells/well) in 1.5 mL of RPMI-1640 medium. After resting for 24 h, cells were exposed to two different treatments: (i) sterile NP suspensions (0.1% w/v) for 24 h, (ii) pre-treatment with LPS (50 ng/mL, Sigma-Aldrich) and IFN- $\gamma$  (20 ng/mL, Biolegend) for 24 h and incubation with sterile NP suspensions (0.1% w/v) for 24 h. Untreated cells were used as control. Total RNA was extracted by using TRIzol (Invitrogen, Carlsbad, CA, USA) according to a standard protocol. Sample quality was assessed by a spectrophotometer (NanoDrop Technologies, Wilmington,

DE, USA). The 260/280 ratios in all the samples were >1.8, and the 260/230 ratios were >1.7. Complementary DNA (cDNA) was synthesized from 1 µg of RNA with the qScript™ cDNA synthesis kit (Quanta Biosciences, Gaithersburg, MD, USA) according to the manufacturer's instructions. The mRNA expression levels of *IL-6* (Hs00174131\_m1), *CXCL8* (Hs00174103\_m1), *IL-10* (Hs00961622\_m1), *TNF-α* (Hs00174128\_m1), *MRC1* (Hs00267207\_m1), and *β-actin* (Hs99999148\_m1) were quantified using TaqMan® Gene Expression assays (Applied Biosystems, Thermo Fisher Scientific, Waltham, MA, USA) and a RT-qPCR 7300 system (Applied Biosystems). The relative quantity (RQ) values were calculated according to the  $2^{-\Delta\Delta C_t}$  method, which reflects the differences in the threshold for each target gene relative to *β-actin* and untreated control cells.

### **Cytokine release**

To assess phenotypic changes, we assessed the effect of hGM-g-PMMA30 NPs on cytokine production by THP-1-derived macrophages. To quantify the levels of IL-6, IL-1β, INF-g, IL-8, IL-10, IL-4 and IL-17A, commercial enzyme-linked immunosorbent assays (ELISA) kits (Biolegend) were used, while the concentration of TNF-α was measured using an Invitrogen kit. For this, THP-1-derived macrophages were grown in RPMI-1640 medium in 24-well plates (2 x 10<sup>5</sup> cells/well) and exposed to two treatments: (i) sterile hGM-g-PMMA30 NPs (0.1% w/v) for 24 h, and (ii) LPS (50 ng/mL, Sigma-Aldrich) and INF-g (20 ng/mL, Biolegend) for 24 h followed by incubation with sterile hGM-g-PMMA30 NPs (0.1% w/v) for 24 h. Untreated cells were used as control. For quantification of INF-g release, cells were polarized only with LPS or left unpolarized. Following 24- or 72-h treatment, the medium was collected, centrifuged, and stored at -20 °C until analysis. The absorbance was measured at 450 nm (reference at 570 nm) using a spectrophotometer (Multiskan GOTM) to quantify the different cytokines.

### **Fibroblast migration**

The migration of the murine fibroblast cell line NIH/3T3 (ATCC® CRL-1658™) in the presence of THP-1-derived macrophages exposed or not to the NPs was assessed in a co-culture model assay [28]. The NIH/3T3 was kindly supplied by Prof. Boaz Mizrahi (Department of Biotechnology and Food Engineering, Technion – Israel Institute of Technology) and cultured in Dulbecco's Modified Eagle's Medium (DMEM, Life Technologies, Corp.) supplemented with L-glutamine, 10% heat-inactivated FBS, and

a penicillin/streptomycin antibiotic mixture (5 mL of a commercial mixture of 100 U/mL penicillin + 100 µg/mL streptomycin per 500 mL medium). Cells were trypsinized (trypsin-EDTA 0.25% w/v, Sigma-Aldrich) every 3-4 days, and the quantification of the living cells was carried out by using the trypan blue (0.4% w/v) exclusion assay.

For the co-culture migration assay, THP-1-derived macrophages ( $2 \times 10^5$  cells/well) were cultured in the bottom of 24-wells plate of chemotaxis chambers (membrane pore size of 8.0 µm, Corning® Costar®, Corning, NY, USA) at 37 °C in RPMI-1640 overnight. Then, cells were treated with NPs (0.1% and 0.5% w/v) for 24 h, the medium was washed out, cells were washed twice with PBS and 600 µL of RPMI-1640 was added. To conduct these experiments, NIH/3T3 cells were cultured in the upper wells of the chemotaxis chambers at a density of  $1 \times 10^4$  cells/insert, in DMEM-high glucose containing 10% FBS. The medium was replaced with DMEM-high glucose containing 0.5% FBS, and the inserts placed above THP-1 cell cultures pre-treated with the NPs or left untreated. The co-culture system was incubated for 48 or 72 h, the fibroblasts in the upper side of the insert were removed using a sterile cotton swab, and the fibroblasts that crossed the membrane were stained and counted. For the 48-h migration assays, fibroblasts were stained with CellTracker™ Green (1:500, Abcam, Cambridge, UK) for 30 min at 37 °C, washed twice with PBS, and imaged using an Eclipse TS100 inverted fluorescent microscope (Nikon Instruments, Tokyo, Japan) equipped with a 1-FM Epi-Fluorescence Attachment. For the 72-h migration assays, cells were fixed with 700 µL ethanol (70% in water) for 10 min, and crystal violet (0.2% w/v in 95% ethanol, 700 µL, Sigma-Aldrich) added for 5 min at RT. The crystal violet excess was gently washed out and the insert was allowed to dry. Cell migration was assessed by counting the number of migrated cells in three randomly selected microscopy fields per well at 10x magnification with ImageJ 1.52 software (National Institutes of Health, Bethesda, MD, USA).

### **Statistical analysis**

GraphPad Prism software version 7.04 (GraphPad Software, San Diego, CA, USA) was used to perform all statistical analyses. The results were presented as the Mean  $\pm$  S.D. and were derived from a minimum of three independent experiments. In all tests, a value of  $P \leq 0.05$  was deemed significant.

## Supplementary Scheme, Tables and Figures

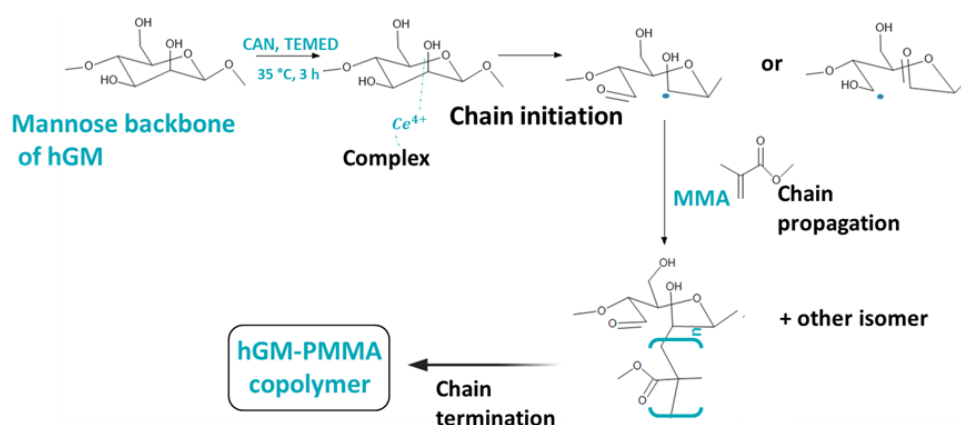

**Scheme S1.** Synthetic pathway of the hGM-g-PMMA30 copolymer.

**Table S1.** Hydrodynamic diameter ( $D_h$ ) and polydispersity index (PDI) of 0.1% w/v hGM-g-PMMA30 NPs in PBS over time, as measured by DLS at 25 °C.

| Incubation time<br>(Days) | $D_h \pm \text{S.D. (nm)}$ – by<br>Intensity | $D_h \pm \text{S.D. (nm)}$ – by<br>Number | PDI $\pm$ S.D.  |
|---------------------------|----------------------------------------------|-------------------------------------------|-----------------|
| 1                         | $140 \pm 10$                                 | $76 \pm 4$                                | $0.27 \pm 0.01$ |
| 14                        | $160 \pm 5$                                  | $85 \pm 8$                                | $0.15 \pm 0.02$ |
| 730                       | $140 \pm 5$                                  | $68 \pm 5$                                | $0.54 \pm 0.03$ |

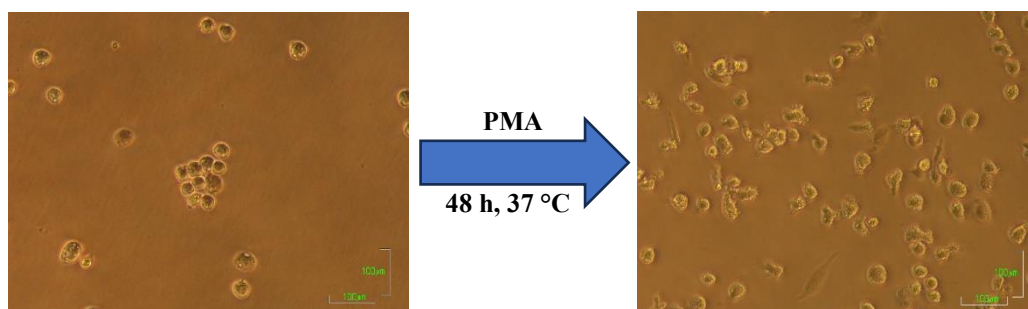

**Figure S1.** Morphological change in THP-1 monocytes upon differentiation into macrophages with PMA.



**Table S2.** Significantly upregulated and downregulated gene genes by THP-1-derived macrophages upon exposure to 0.1% w/v hGM-g-PMMA30 NPs for 24 h.

| Gene symbol              | Protein name                                              | Biological function of the protein                                                           |
|--------------------------|-----------------------------------------------------------|----------------------------------------------------------------------------------------------|
| <b>Upregulated genes</b> |                                                           |                                                                                              |
| <i>MT1L</i>              | Metallothionein-1L                                        | Metal binding protein involved in metal homeostasis and detoxification                       |
| <i>MT1G</i>              | Metallothionein-1G                                        | Metal binding protein involved in metal homeostasis and detoxification                       |
| <i>S100A8</i>            | S100 calcium-binding protein A8                           | Calcium-binding protein involved in immune response and inflammation                         |
| <i>S100A9</i>            | S100 calcium-binding protein A9                           | Calcium-binding protein involved in immune response and inflammation                         |
| <i>CILP</i>              | Cartilage intermediate layer protein                      | Involved in cartilage formation and maintenance                                              |
| <i>MT1F</i>              | Metallothionein-1F                                        | Metal binding protein involved in metal homeostasis and detoxification                       |
| <i>S100A12</i>           | S100 calcium-binding protein A12                          | Calcium-binding protein involved in immune response and inflammation                         |
| <i>MT1X</i>              | Metallothionein-1X                                        | Metal binding protein involved in metal homeostasis and detoxification                       |
| <i>CCL22</i>             | C-C motif chemokine ligand 22                             | Chemokine involved in immune response and inflammation                                       |
| <i>MT2A</i>              | Metallothionein-2A                                        | Metal binding protein involved in metal homeostasis and detoxification                       |
| <i>G0S2</i>              | G0/G1 switch gene 2                                       | Regulates adipogenesis and lipolysis                                                         |
| <i>SAMD10</i>            | Sterile alpha motif domain containing 10                  | Protein of unknown function                                                                  |
| <i>APOC1P1</i>           | Apolipoprotein C1 pseudogene 1                            | Non-coding RNA                                                                               |
| <i>SPINT1-AS1</i>        | Serine peptidase inhibitor, Kunitz type 1 antisense RNA 1 | Non-coding RNA                                                                               |
| <i>NPR1</i>              | Natriuretic peptide receptor 1                            | Receptor for natriuretic peptides involved in regulation of blood pressure and fluid balance |
| <i>MT1E</i>              | Metallothionein-1E                                        | Metal binding protein involved in metal homeostasis and detoxification                       |
| <i>MCUB</i>              | Mitochondrial calcium uniporter                           | Transports calcium ions into mitochondria                                                    |
| <i>MYO15B</i>            | Myosin XVb                                                | Actin-based motor protein involved in vesicle transport                                      |
| <i>CORO1A</i>            | Coronin 1A                                                | Actin-binding protein involved in cell motility and immune response                          |
| <i>ASS1</i>              | Argininosuccinate synthase 1                              | Catalyzes the formation of argininosuccinate from citrulline and aspartate in the urea cycle |
| <i>ZNF837</i>            | Zinc finger protein 837                                   | Transcription factor involved in regulation of gene expression                               |

|                 |                                              |                                                                                                                                                                                                                                                                                                                                                          |
|-----------------|----------------------------------------------|----------------------------------------------------------------------------------------------------------------------------------------------------------------------------------------------------------------------------------------------------------------------------------------------------------------------------------------------------------|
| <i>KIFC2</i>    | Kinesin family member C2                     | Microtubule-based motor protein involved in intracellular transport                                                                                                                                                                                                                                                                                      |
| <i>CA11</i>     | Carbonic anhydrase 11                        | Catalyzes the reversible hydration of carbon dioxide                                                                                                                                                                                                                                                                                                     |
| <i>APOE</i>     | Apolipoprotein E                             | Binds to and transports lipids, involved in cholesterol metabolism                                                                                                                                                                                                                                                                                       |
| <i>IFT140</i>   | Intraflagellar transport protein 140 homolog | Involved in cilia formation and maintenance                                                                                                                                                                                                                                                                                                              |
| <i>PTGDS</i>    | Prostaglandin D2 synthase                    | Catalyzes the conversion of prostaglandin H2 to prostaglandin D2                                                                                                                                                                                                                                                                                         |
| <i>ENKD1</i>    | Enkurin domain containing 1                  | Protein of unknown function                                                                                                                                                                                                                                                                                                                              |
| <i>BEX1</i>     | Brain expressed X-linked protein 1           | Involved in neuronal development and differentiation                                                                                                                                                                                                                                                                                                     |
| <i>CHIT1</i>    | Chitinase 1                                  | Hydrolyzes chitin, a component of fungal cell walls                                                                                                                                                                                                                                                                                                      |
| <i>HMOX1</i>    | Heme oxygenase 1                             | HMOX1 is an enzyme that catalyzes the breakdown of heme into biliverdin, carbon monoxide (CO), and iron. It plays a role in regulating oxidative stress, inflammation, and cellular homeostasis. HMOX1 induction has been shown to confer protection against a variety of stresses, including ischemia-reperfusion injury, sepsis, and oxidative stress. |
| <i>NXF3</i>     | NXF3                                         | Nuclear RNA export factor 3                                                                                                                                                                                                                                                                                                                              |
| <i>MGST1</i>    | MGST1                                        | Glutathione S-transferase Mu 1                                                                                                                                                                                                                                                                                                                           |
| <i>ALOX5AP</i>  | ALOX5AP                                      | Arachidonate 5-lipoxygenase-activating protein                                                                                                                                                                                                                                                                                                           |
| <i>POU2F2</i>   | POU2F2                                       | POU domain, class 2, transcription factor 2                                                                                                                                                                                                                                                                                                              |
| <i>YPEL3</i>    | YPEL3                                        | Yippee-like protein 3                                                                                                                                                                                                                                                                                                                                    |
| <i>APOC1</i>    | APOC1                                        | Apolipoprotein C1                                                                                                                                                                                                                                                                                                                                        |
| <i>SLC25A23</i> | SLC25A23                                     | Solute carrier family 25 member 23                                                                                                                                                                                                                                                                                                                       |
| <i>ADD3</i>     | ADD3                                         | Adducin 3                                                                                                                                                                                                                                                                                                                                                |
| <i>HSPB1</i>    | HSPB1                                        | Heat shock protein beta-1                                                                                                                                                                                                                                                                                                                                |
| <i>EPHX1</i>    | EPHX1                                        | Epoxide hydrolase 1                                                                                                                                                                                                                                                                                                                                      |
| <i>LAIR1</i>    | LAIR1                                        | Leukocyte-associated immunoglobulin-like receptor 1                                                                                                                                                                                                                                                                                                      |
| <i>FADS3</i>    | FADS3                                        | Fatty acid desaturase 3                                                                                                                                                                                                                                                                                                                                  |
| <i>DGAT2</i>    | DGAT2                                        | Diacylglycerol O-acyltransferase 2                                                                                                                                                                                                                                                                                                                       |
| <i>SLC27A3</i>  | SLC27A3                                      | Solute carrier family 27 member 3                                                                                                                                                                                                                                                                                                                        |
| <i>CYP1B1</i>   | CYP1B1                                       | Cytochrome P450 family 1 subfamily B member 1                                                                                                                                                                                                                                                                                                            |
| <i>SLC17A7</i>  | SLC17A7                                      | Solute carrier family 17 member 7                                                                                                                                                                                                                                                                                                                        |
| <i>TBL1XR1</i>  | TBL1XR1                                      | Transducin beta-like 1X-linked receptor 1                                                                                                                                                                                                                                                                                                                |
| <i>MUTYH</i>    | MUTYH                                        | MutY homolog                                                                                                                                                                                                                                                                                                                                             |
| <i>TIMP1</i>    | TIMP1                                        | Tissue inhibitor of metalloproteinases 1                                                                                                                                                                                                                                                                                                                 |
| <i>MMP7</i>     | MMP7                                         | Matrix metalloproteinase 7                                                                                                                                                                                                                                                                                                                               |
| <i>RPRD2</i>    | RPRD2                                        | Regulation of nuclear pre-mRNA domain-containing protein 2                                                                                                                                                                                                                                                                                               |

|                            |                                                              |                                                                                                                                                                             |
|----------------------------|--------------------------------------------------------------|-----------------------------------------------------------------------------------------------------------------------------------------------------------------------------|
| <i>ARHGAP9</i>             | ARHGAP9                                                      | Rho GTPase-activating protein 9                                                                                                                                             |
| <i>PRXL2A</i>              | PRXL2A                                                       | Prospero homeobox-like 2                                                                                                                                                    |
| <i>NRGN</i>                | NRGN                                                         | Neuronal regeneration-related protein                                                                                                                                       |
| <i>PDE1B</i>               | PDE1B                                                        | Phosphodiesterase 1B                                                                                                                                                        |
| <i>MND1</i>                | MND1                                                         | Meiotic nuclear divisions protein 1 homolog                                                                                                                                 |
| <i>FTH1</i>                | FTH1                                                         | Ferritin heavy chain 1                                                                                                                                                      |
| <i>NDUFS2</i>              | NDUFS2                                                       | NADH-ubiquinone oxidoreductase 75 kDa subunit                                                                                                                               |
| <b>Downregulated genes</b> |                                                              |                                                                                                                                                                             |
| <i>MSR1</i>                | Macrophage scavenger receptor 1                              | Mediates the binding and uptake of oxidized low-density lipoproteins (oxLDL)                                                                                                |
| <i>CD36</i>                | CD36 antigen                                                 | Binds multiple ligands, including lipids, apoptotic cells, and pathogens, and has roles in lipid metabolism, immune response, and angiogenesis                              |
| <i>NRAP</i>                | Nebulin-related-anchoring protein                            | Anchors nebulin and alpha-actinin to the sarcoplasmic reticulum in skeletal muscle                                                                                          |
| <i>FABP4</i>               | Fatty acid-binding protein 4                                 | Binds fatty acids and other hydrophobic ligands, and is involved in the regulation of lipid metabolism and glucose homeostasis                                              |
| <i>CCL1</i>                | Chemokine (C-C motif) ligand 1                               | Chemoattractant for T cells and basophils, and has roles in inflammation and immune response                                                                                |
| <i>AC006967.3</i>          | Uncharacterized protein                                      | Currently, there is no information available on the function of this protein                                                                                                |
| <i>SSTR2</i>               | Somatostatin receptor type 2                                 | Mediates the effects of somatostatin, a peptide hormone that regulates the endocrine and nervous systems                                                                    |
| <i>MAF</i>                 | v-maf avian musculoaponeurotic fibrosarcoma oncogene homolog | Transcription factor that regulates the expression of genes involved in cell differentiation, proliferation, and apoptosis                                                  |
| <i>CAMK2N1</i>             | Calcium/calmodulin-dependent protein kinase II inhibitor 1   | Inhibits the activity of calcium/calmodulin-dependent protein kinase II, which is involved in various cellular processes, including synaptic plasticity and gene expression |
| <i>EPB41L2</i>             | Erythrocyte membrane protein band 4.1-like 2                 | Plays a role in the organization and stability of the cytoskeleton, and has been implicated in tumorigenesis                                                                |
| <i>FAM131B</i>             | Family with sequence similarity 131 member B                 | Regulates the activity of AKT and mTOR, two protein kinases that play important roles in cell growth, survival, and metabolism                                              |
| <i>MEPE</i>                | Matrix extracellular phosphoglycoprotein                     | Involved in the regulation of mineralization in bones and teeth                                                                                                             |
| <i>AL109918.1</i>          | Uncharacterized protein                                      | Unknown                                                                                                                                                                     |
| <i>CYP26B1</i>             | Cytochrome P450 family 26 subfamily B member 1               | Catalyzes the metabolism of retinoic acid, a vitamin A derivative that plays important roles in embryonic development and tissue homeostasis                                |

|                  |                                                      |                                                                                                                                          |
|------------------|------------------------------------------------------|------------------------------------------------------------------------------------------------------------------------------------------|
| <i>VAT1L</i>     | Vesicle amine transport protein 1 homolog-like       | Involved in the transport and storage of neurotransmitters, including dopamine and serotonin                                             |
| <i>SECTM1</i>    | Secreted and transmembrane 1                         | Plays a role in immune regulation and tumor progression                                                                                  |
| <i>INHBE</i>     | Inhibin beta E chain                                 | Subunit of the activin/inhibin complex, which regulates the secretion of follicle-stimulating hormone (FSH) and luteinizing hormone (LH) |
| <i>ZBTB7C</i>    | Zinc finger and BTB domain-containing protein 7C     | Transcription factor that regulates the expression of genes involved in cell proliferation and differentiation                           |
| <i>ANKRD29</i>   | Ankyrin repeat domain-containing protein 29          | Plays a role in cell adhesion and migration, and has been implicated in cancer metastasis                                                |
| <i>SCG2</i>      | Secretogranin II                                     | Involved in the processing and sorting of secreted proteins.                                                                             |
| <i>OR7E28P</i>   | Olfactory receptor 7E28 pseudogene                   | Unknown                                                                                                                                  |
| <i>TM4SF19</i>   | Transmembrane 4 L six family member 19               | May be involved in the regulation of cell adhesion and migration.                                                                        |
| <i>WIPF3</i>     | WAS/WASL interacting protein family member 3         | Involved in the regulation of actin polymerization and cytoskeletal organization.                                                        |
| <i>DAPL1</i>     | Death associated protein like 1                      | May play a role in the regulation of cell death pathways.                                                                                |
| <i>SUCNR1</i>    | Succinate receptor 1                                 | Functions as a G protein-coupled receptor for succinate, a metabolite involved in energy metabolism.                                     |
| <i>SCUBE1</i>    | Signal peptide, CUB domain, EGF-like 1               | May be involved in the regulation of cell adhesion and migration.                                                                        |
| <i>CCL2</i>      | C-C motif chemokine ligand 2                         | Functions as a chemoattractant for monocytes and macrophages.                                                                            |
| <i>GPR34</i>     | G protein-coupled receptor 34                        | May play a role in immune regulation and inflammation.                                                                                   |
| <i>LPAR6</i>     | Lysophosphatidic acid receptor 6                     | Functions as a G protein-coupled receptor for lysophosphatidic acid, a signaling molecule involved in various cellular processes.        |
| <i>FA2H</i>      | Fatty acid 2-hydroxylase                             | Catalyzes the hydroxylation of fatty acids, which may play a role in the regulation of cell signaling and metabolism.                    |
| <i>KCNA2</i>     | Potassium voltage-gated channel subfamily A member 2 | Forms a voltage-gated ion channel that regulates the flow of potassium ions across cell membranes.                                       |
| <i>SIAE</i>      | Sialic acid acetyltransferase                        | Catalyzes the hydrolysis of acetyl groups from sialic acid residues, which may play a role in immune regulation and inflammation.        |
| <i>MFGE8</i>     | Milk fat globule-EGF factor 8 protein                | Functions in the clearance of apoptotic cells and the regulation of inflammation.                                                        |
| <i>LINC02154</i> | Long intergenic non-protein coding RNA 2154          | Unknown                                                                                                                                  |

|                 |                                                                  |                                                                                                                                             |
|-----------------|------------------------------------------------------------------|---------------------------------------------------------------------------------------------------------------------------------------------|
| <i>GPC3</i>     | Glypican 3                                                       | Functions in the regulation of cell growth and differentiation.                                                                             |
| <i>SDK1</i>     | Sidekick cell adhesion molecule 1                                | May be involved in the regulation of cell adhesion and migration.                                                                           |
| <i>MTUS1</i>    | Microtubule associated tumor suppressor 1                        | May play a role in the regulation of microtubule dynamics and the cell cycle.                                                               |
| <i>SLAMF6</i>   | SLAM family member 6                                             | Functions as an activating receptor on natural killer cells and may play a role in immune regulation.                                       |
| <i>GDF15</i>    | Growth differentiation factor 15                                 | Functions as a cytokine that regulates various cellular processes, including cell growth and differentiation, inflammation, and metabolism. |
| <i>CD84</i>     | CD84 molecule                                                    | May be involved in the regulation of immune cell function and activation.                                                                   |
| <i>GPMB</i>     | Glycoprotein non-metastatic melanoma protein B                   | May play a role in the regulation of cell growth and differentiation, and may be involved in the progression of certain types of cancer.    |
| <i>LRCH1</i>    | Leucine-rich repeats and calponin homology domain containing 1   | May be involved in the regulation of cell adhesion and migration.                                                                           |
| <i>NLK</i>      | Nemo-like kinase                                                 | Plays a role in cell cycle regulation and apoptosis                                                                                         |
| <i>CTSW</i>     | Cathepsin W                                                      | A lysosomal protease involved in protein degradation and antigen presentation                                                               |
| <i>SPSB1</i>    | SplA/ryanodine receptor domain and SOCS box containing protein 1 | A protein involved in regulating various signaling pathways                                                                                 |
| <i>SERPINI1</i> | Serpin family I member 1                                         | A serine protease inhibitor involved in blood coagulation and fibrinolysis                                                                  |
| <i>FCRLA</i>    | Fc receptor-like A                                               | Belongs to the immunoglobulin superfamily and is involved in immune responses                                                               |
| <i>ITGB5</i>    | Integrin beta-5                                                  | A transmembrane protein that plays a role in cell adhesion and signaling                                                                    |
| <i>NMB</i>      | Neuromedin B                                                     | A peptide hormone involved in various physiological processes such as smooth muscle contraction and blood pressure regulation               |
| <i>CYBB</i>     | Cytochrome b-245 beta chain                                      | A component of the phagocyte NADPH oxidase system involved in generating reactive oxygen species                                            |
| <i>GUCY1A2</i>  | Guanylate cyclase 1 soluble subunit alpha-2                      | An enzyme that catalyzes the production of cyclic GMP and is involved in various physiological processes such as smooth muscle relaxation   |
| <i>MCPH1</i>    | Microcephalin 1                                                  | Involved in brain development and cell cycle regulation                                                                                     |
| <i>ISYNA1</i>   | Inositol-3-phosphate synthase A1                                 | An enzyme involved in inositol synthesis                                                                                                    |

|                  |                                                  |                                                                                                                                                                                  |
|------------------|--------------------------------------------------|----------------------------------------------------------------------------------------------------------------------------------------------------------------------------------|
| <i>LIPA</i>      | Lysosomal acid lipase                            | A lysosomal enzyme involved in lipid metabolism                                                                                                                                  |
| <i>EMP1</i>      | Epithelial membrane protein 1                    | A membrane protein involved in cell adhesion and signaling                                                                                                                       |
| <i>SLC15A3</i>   | Solute carrier family 15 member 3                | A transporter protein involved in the transport of small peptides and drugs                                                                                                      |
| <i>UGCG</i>      | UDP-glucose ceramide glucosyltransferase         | An enzyme involved in the synthesis of glycosphingolipids                                                                                                                        |
| <i>DBI</i>       | Diazepam binding inhibitor                       | A protein involved in the regulation of the GABAergic system                                                                                                                     |
| <i>A2M</i>       | Alpha-2-macroglobulin                            | A protease inhibitor involved in various physiological processes such as immune defense and wound healing                                                                        |
| <i>PNOC</i>      | Prepronociceptin                                 | A precursor protein involved in pain modulation                                                                                                                                  |
| <i>CSF1</i>      | Colony stimulating factor 1                      | A cytokine that regulates the proliferation, differentiation, and survival of macrophages                                                                                        |
| <i>DUSP2</i>     | Dual specificity phosphatase 2                   | A phosphatase involved in the regulation of various signaling pathways                                                                                                           |
| <i>ATP6V1H</i>   | ATPase H <sup>+</sup> transporting V1 subunit H  | A component of the V-ATPase complex involved in acidification of intracellular compartments                                                                                      |
| <i>PCSK6</i>     | Proprotein convertase subtilisin/kexin type 6    | A protease involved in the processing of various precursor proteins                                                                                                              |
| <i>LPL</i>       | Lipoprotein lipase                               | An enzyme involved in the hydrolysis of triglycerides in lipoproteins                                                                                                            |
| <i>LINC01010</i> | Long intergenic non-protein coding RNA 1010      | A non-coding RNA with an unknown function                                                                                                                                        |
| <i>PLD3</i>      | Phospholipase D family member 3                  | An enzyme involved in phospholipid metabolism                                                                                                                                    |
| <i>GIN3</i>      | GIN3 complex subunit 3                           | A component of the GINS complex involved in DNA replication                                                                                                                      |
| <i>MGP</i>       | Matrix Gla protein                               | MGP is a vitamin K-dependent protein that acts as an inhibitor of calcification. It plays a role in regulating bone mineralization and the prevention of arterial calcification. |
| <i>TGM2</i>      | Transglutaminase 2                               | Catalyzes the cross-linking of proteins and stabilizes extracellular matrix, involved in cell adhesion and apoptosis                                                             |
| <i>RASD2</i>     | RASD family, member 2                            | Involved in the regulation of G protein signaling                                                                                                                                |
| <i>AP3M2</i>     | Adaptor-related protein complex 3, mu 2 subunit  | Component of the AP3 complex, involved in intracellular vesicle trafficking                                                                                                      |
| <i>DCSTAMP</i>   | Dendrocyte expressed seven transmembrane protein | Cell surface receptor involved in osteoclast differentiation                                                                                                                     |
| <i>SGK1</i>      | Serum and glucocorticoid-regulated kinase 1      | Involved in the regulation of ion transport, cell survival, and glucose homeostasis                                                                                              |

|                 |                                                       |                                                                                           |
|-----------------|-------------------------------------------------------|-------------------------------------------------------------------------------------------|
| <i>DYSF</i>     | Dysferlin                                             | Involved in the repair of damaged muscle membranes                                        |
| <i>FAM234B</i>  | Family with sequence similarity 234, member B         | Function is currently unknown                                                             |
| <i>PLXDC2</i>   | Plexin domain containing 2                            | Cell surface receptor involved in cell adhesion and migration                             |
| <i>SAMD4A</i>   | Sterile alpha motif domain containing 4A              | Involved in mRNA degradation and regulation of translation                                |
| <i>ATP1B1</i>   | Sodium/potassium-transporting ATPase subunit beta-1   | Component of the sodium-potassium ATPase, involved in the maintenance of ion homeostasis  |
| <i>ITGA11</i>   | Integrin alpha-11                                     | Cell surface receptor involved in cell adhesion and migration                             |
| <i>SPRED1</i>   | Sprouty-related EVH1 domain-containing protein 1      | Involved in the regulation of cell growth and differentiation                             |
| <i>RIOX1</i>    | Ribosomal oxygenase 1                                 | Involved in the biosynthesis of modified nucleosides in ribosomal RNA                     |
| <i>FCER1G</i>   | High affinity immunoglobulin E receptor gamma subunit | Component of the high-affinity IgE receptor, involved in allergic reactions               |
| <i>FCMR</i>     | Fc mu receptor                                        | Cell surface receptor involved in the regulation of B cell activation and proliferation   |
| <i>AQP9</i>     | Aquaporin 9                                           | Transmembrane protein involved in the transport of water and glycerol                     |
| <i>GPC4</i>     | Glypican 4                                            | Cell surface proteoglycan involved in the regulation of growth factor signaling           |
| <i>MAFF</i>     | Transcription factor MAFF                             | Involved in the regulation of gene expression and the response to oxidative stress        |
| <i>KLF6</i>     | Krüppel-like factor 6                                 | Transcription factor involved in the regulation of cell proliferation and differentiation |
| <i>FLRT2</i>    | Fibronectin leucine-rich transmembrane protein 2      | Cell surface receptor involved in cell adhesion and migration                             |
| <i>RBMX</i>     | RNA binding motif protein, X-linked                   | Involved in the regulation of RNA splicing and translation                                |
| <i>RABGAP1L</i> | RAB GTPase activating protein 1-like                  | Involved in the regulation of intracellular vesicle trafficking                           |
| <i>CTSH</i>     | Cathepsin H                                           | Lysosomal protease involved in protein degradation                                        |
| <i>ZFP36L1</i>  | Zinc finger protein 36, C3H type-like 1               | Involved in the regulation of mRNA stability and the immune response                      |
| <i>SAMHD1</i>   | SAM and HD domain-containing protein 1                | Involved in the regulation of nucleotide metabolism and immune response                   |
| <i>TKTL1</i>    | Transketolase-like protein 1                          | Involved in the regulation of glucose metabolism                                          |
| <i>CD109</i>    | CD109 antigen                                         | Cell surface receptor involved in the regulation of TGF-beta signaling                    |
| <i>KIAA0930</i> | Unknown                                               | Unknown                                                                                   |

|                |                                                         |                                                                                         |
|----------------|---------------------------------------------------------|-----------------------------------------------------------------------------------------|
| <i>SCARB2</i>  | Scavenger receptor class B member 2                     | Involved in the uptake of lipids such as cholesterol and regulation of lipid metabolism |
| <i>ATF3</i>    | Activating transcription factor 3                       | Transcription factor involved in stress response and inflammation                       |
| <i>HSD17B4</i> | Hydroxysteroid 17-beta dehydrogenase 4                  | Enzyme involved in fatty acid beta-oxidation                                            |
| <i>SUSD1</i>   | Sushi domain-containing protein 1                       | Involved in cell adhesion and signaling                                                 |
| <i>DAB2</i>    | Disabled homolog 2                                      | Adaptor protein involved in endocytosis and signal transduction                         |
| <i>ARHGEF3</i> | Rho guanine nucleotide exchange factor 3                | Activates Rho GTPases involved in cytoskeletal organization and cell motility           |
| <i>SLC17A5</i> | Solute carrier family 17 member 5                       | Transports sulfate and thiosulfate ions across the cell membrane                        |
| <i>ERMP1</i>   | Endoplasmic reticulum metalloproteinase 1               | Protease involved in processing of secretory proteins                                   |
| <i>OXR1</i>    | Oxidation resistance 1                                  | Involved in antioxidant defense and protection against oxidative stress                 |
| <i>C5AR2</i>   | Complement component 5a receptor 2                      | Receptor for complement component 5a, involved in inflammatory response                 |
| <i>TNS3</i>    | Tensin-3                                                | Adaptor protein involved in cell adhesion and migration                                 |
| <i>NES</i>     | Nestin                                                  | Intermediate filament protein involved in neural stem cell differentiation              |
| <i>ANKRD10</i> | Ankyrin repeat domain-containing protein 10             | Function unknown                                                                        |
| <i>RPLP0P2</i> | Ribosomal protein lateral stalk subunit P0 pseudogene 2 | Non-functional pseudogene of ribosomal protein                                          |
| <i>WARS</i>    | Tryptophan--tRNA ligase, cytoplasmic                    | Enzyme involved in protein synthesis                                                    |
| <i>GNS</i>     | N-acetylglucosamine-6-sulfatase                         | Enzyme involved in the catabolism of glycosaminoglycans                                 |
| <i>VPS37C</i>  | Vacuolar protein sorting-associated protein 37C         | Involved in endosomal protein sorting                                                   |
| <i>NAPIL1</i>  | Nucleosome assembly protein 1-like 1                    | Involved in histone assembly and chromatin remodeling                                   |
| <i>HPCAL1</i>  | Hippocalcin-like protein 1                              | Calcium-binding protein involved in signal transduction                                 |
| <i>FGL2</i>    | Fibrinogen-like protein 2                               | Involved in blood coagulation and immune regulation                                     |
| <i>SNX9</i>    | Sorting nexin-9                                         | Involved in endocytosis and intracellular trafficking                                   |
| <i>MSMO1</i>   | Methylsterol monooxygenase 1                            | Enzyme involved in cholesterol biosynthesis                                             |
| <i>RGS2</i>    | Regulator of G-protein signaling 2                      | Modulator of G protein-coupled receptor signaling                                       |
| <i>CTSS</i>    | Cathepsin S                                             | Protease involved in antigen processing and presentation                                |



|               |                                                          |                                                                                                                                                               |
|---------------|----------------------------------------------------------|---------------------------------------------------------------------------------------------------------------------------------------------------------------|
| <i>SNX4</i>   | Sorting nexin-4                                          | Involved in intracellular trafficking and membrane dynamics                                                                                                   |
| <i>ITGB1</i>  | Integrin beta-1                                          | Cell adhesion protein involved in cytoskeleton organization and signaling                                                                                     |
| <i>WDR1</i>   | WD repeat-containing protein 1                           | Regulator of actin cytoskeleton dynamics                                                                                                                      |
| <i>ITGA5</i>  | Integrin alpha-5                                         | Cell adhesion protein involved in cell migration and signaling                                                                                                |
| <i>PI4K2A</i> | Phosphatidylinositol 4-kinase alpha                      | Catalyzes the phosphorylation of phosphatidylinositol to form phosphatidylinositol 4-phosphate, which plays a role in cell signaling and membrane trafficking |
| <i>ASAH1</i>  | Acid ceramidase                                          | Hydrolyzes the sphingolipid ceramide to generate sphingosine, which is involved in cell signaling and apoptosis                                               |
| <i>RGS1</i>   | Regulator of G protein signaling 1                       | Inactivates G protein-coupled receptors (GPCRs) by accelerating the GTPase activity of the G alpha subunit                                                    |
| <i>NCOA3</i>  | Nuclear receptor coactivator 3                           | Enhances the transcriptional activity of nuclear hormone receptors by binding to them and recruiting other transcriptional coactivators                       |
| <i>LRRC8A</i> | Leucine-rich repeat-containing protein 8A                | Component of a volume-regulated anion channel that plays a role in cell volume regulation and apoptosis                                                       |
| <i>PRAG1</i>  | PR/SET domain-containing protein 1                       | Regulator of histone methylation that plays a role in transcriptional regulation and DNA repair                                                               |
| <i>IRS1</i>   | Insulin receptor substrate 1                             | Mediator of insulin signaling that plays a role in glucose homeostasis                                                                                        |
| <i>SUN2</i>   | Sad1 and UNC84 domain-containing protein 2               | Component of the linker of nucleoskeleton and cytoskeleton (LINC) complex that plays a role in nuclear positioning and migration                              |
| <i>RBM3</i>   | RNA-binding motif protein 3                              | RNA-binding protein that plays a role in mRNA splicing and stability                                                                                          |
| <i>ITGB7</i>  | Integrin beta-7                                          | Cell adhesion molecule that plays a role in leukocyte trafficking and homing                                                                                  |
| <i>STOM</i>   | Stomatin                                                 | Membrane protein that plays a role in the regulation of ion channels and transporters                                                                         |
| <i>LCP2</i>   | Lymphocyte cytosolic protein 2                           | Adaptor protein that plays a role in T cell activation and signaling                                                                                          |
| <i>BCL2A1</i> | B-cell lymphoma 2-related protein A1                     | Anti-apoptotic protein that plays a role in cell survival and differentiation                                                                                 |
| <i>M6PR</i>   | Cation-dependent mannose-6-phosphate receptor            | Mediates the transport of lysosomal enzymes from the Golgi to lysosomes                                                                                       |
| <i>UBALD1</i> | Ubiquitin-associated and SH3 domain-containing protein A | Adapter protein that plays a role in protein degradation and trafficking                                                                                      |

|                  |                                                                             |                                                                                                                            |
|------------------|-----------------------------------------------------------------------------|----------------------------------------------------------------------------------------------------------------------------|
| <i>SYT7</i>      | Synaptotagmin-7                                                             | Calcium-binding protein that plays a role in synaptic vesicle exocytosis and neurotransmitter release                      |
| <i>HSD3B7</i>    | 3-beta-hydroxysteroid dehydrogenase type 7                                  | Enzyme involved in bile acid synthesis                                                                                     |
| <i>TOP1</i>      | DNA topoisomerase 1                                                         | Enzyme that relieves DNA supercoiling by introducing reversible single-strand breaks                                       |
| <i>KRR1</i>      | KRR1 small subunit processome component homolog                             | Component of the small subunit (SSU) processome that plays a role in ribosome biogenesis                                   |
| <i>MMP14</i>     | Matrix metalloproteinase-14                                                 | Zinc-dependent endopeptidase that plays a role in extracellular matrix remodeling and cell signaling                       |
| <i>MYO1E</i>     | Myosin IE                                                                   | Actin-based motor protein that plays a role in intracellular transport and membrane dynamics                               |
| <i>ESYT2</i>     | Extended Synaptotagmin-2                                                    | Binds to and transfers phospholipids between two bilayer membranes during vesicle fusion                                   |
| <i>HS2ST1</i>    | Heparan sulfate 2-O-sulfotransferase 1                                      | Catalyzes the transfer of sulfate to position 2 of uronic acid residues of heparan sulfate proteoglycans                   |
| <i>SLC16A3</i>   | Monocarboxylate transporter 4                                               | Facilitates the transport of monocarboxylates, such as lactate and pyruvate, across the plasma membrane                    |
| <i>PLEKHO1</i>   | Pleckstrin homology domain-containing family O member 1                     | Involved in cell signaling pathways that regulate the actin cytoskeleton and cell adhesion                                 |
| <i>PSEN2</i>     | Presenilin-2                                                                | Component of the gamma-secretase complex, which cleaves transmembrane proteins such as amyloid precursor protein and Notch |
| <i>CNIH3</i>     | Cornichon family AMPA receptor auxiliary protein 3                          | Modulates AMPA receptor gating and trafficking                                                                             |
| <i>LMO4</i>      | LIM domain only 4                                                           | Transcription factor that plays a role in embryonic development and cell differentiation                                   |
| <i>KCNAB2</i>    | Potassium voltage-gated channel subfamily A member accessory beta subunit 2 | Modulates the function and gating properties of voltage-gated potassium channels                                           |
| <i>TNFAIP8L3</i> | Tumor necrosis factor alpha-induced protein 8-like 3                        | Involved in regulating cell proliferation and apoptosis, as well as inflammation and immune responses                      |
| <i>SPP1</i>      | Secreted phosphoprotein 1                                                   | Mediates cell adhesion, migration, and signaling, and is involved in bone mineralization and immune responses              |
| <i>COL6A1</i>    | Collagen type VI alpha 1 chain                                              | A component of extracellular matrix that provides structural support to tissues and organs                                 |

|                |                                                                 |                                                                                                                                           |
|----------------|-----------------------------------------------------------------|-------------------------------------------------------------------------------------------------------------------------------------------|
| <i>COPA</i>    | Coatamer subunit alpha                                          | Forms a complex with other proteins that coats vesicles and facilitates the transport of proteins between different cellular compartments |
| <i>SEPT9</i>   | Septin-9                                                        | Plays a role in cytokinesis, cell division, and cell migration                                                                            |
| <i>GLCCII</i>  | Glucocorticoid-induced transcript 1 protein                     | Involved in the regulation of glucocorticoid receptor signaling and steroid hormone metabolism                                            |
| <i>FLNA</i>    | Filamin A                                                       | A cytoskeletal protein that crosslinks actin filaments and anchors transmembrane proteins to the cytoskeleton                             |
| <i>CIZ1</i>    | CDKN1A-interacting zinc finger protein 1                        | Regulates DNA replication and cell cycle progression                                                                                      |
| <i>CYFIP1</i>  | Cytoplasmic FMR1-interacting protein 1                          | Involved in the regulation of cytoskeletal dynamics and cell migration                                                                    |
| <i>LIMS1</i>   | LIM and senescent cell antigen-like-containing domain protein 1 | Regulates cell adhesion and migration, and plays a role in the development of the nervous system                                          |
| <i>PTBP1</i>   | Polypyrimidine tract-binding protein 1                          | Involved in pre-mRNA splicing and mRNA stability and transport                                                                            |
| <i>CAB39</i>   | Calcium-binding protein 39                                      | Activates the protein kinase activity of LKB1, which is involved in regulating cell growth and metabolism                                 |
| <i>MYL12A</i>  | Myosin regulatory light chain 12A                               | Involved in regulation of smooth muscle contraction and cell migration                                                                    |
| <i>FAM129B</i> | Family with sequence similarity 129, member B                   | Functions in cell adhesion, migration, and proliferation                                                                                  |
| <i>TPT1</i>    | Tumor protein, translationally-controlled 1                     | Regulates various cellular processes including proliferation, differentiation, and apoptosis                                              |
| <i>MBP</i>     | Myelin basic protein                                            | Structural component of the myelin sheath in the central nervous system                                                                   |
| <i>IRAK1</i>   | Interleukin-1 receptor-associated kinase 1                      | Mediates signaling downstream of Toll-like receptors and interleukin-1 receptors                                                          |
| <i>ZBTB7A</i>  | Zinc finger and BTB domain-containing protein 7A                | Transcriptional regulator involved in cellular differentiation and proliferation                                                          |
| <i>CTSB</i>    | Cathepsin B                                                     | Lysosomal cysteine protease involved in protein degradation and processing                                                                |
| <i>TLN1</i>    | Talin-1                                                         | Adaptor protein that links integrins to the actin cytoskeleton and plays a role in cell adhesion and migration                            |
| <i>CELF1</i>   | CUGBP, Elav-like family member 1                                | RNA-binding protein that regulates alternative splicing and translation of target mRNAs                                                   |
| <i>ZYX</i>     | Zyxin                                                           | Acts as a scaffold protein at sites of cell adhesion and regulates actin cytoskeleton dynamics                                            |

|               |                                                   |                                                                                                                                |
|---------------|---------------------------------------------------|--------------------------------------------------------------------------------------------------------------------------------|
| <i>CHST11</i> | Carbohydrate sulfotransferase 11                  | Catalyzes the transfer of sulfate to carbohydrate residues and plays a role in the biosynthesis of sulfated glycosaminoglycans |
| <i>ACTR3</i>  | Actin-related protein 3                           | Component of the Arp2/3 complex which mediates actin polymerization and cytoskeletal remodeling                                |
| <i>PHLDA1</i> | Pleckstrin homology-like domain family A member 1 | Regulator of apoptosis and cellular proliferation, may also be involved in insulin signaling pathways                          |

**Table S3.** Significantly upregulated and downregulated gene genes by THP-1-derived macrophages upon exposure to 0.1% w/v hGM-g-PMMA30 NPs for 72 h.

| Gene symbol              | Protein name                                       | Biological function of the protein |
|--------------------------|----------------------------------------------------|------------------------------------|
| <b>Upregulated genes</b> |                                                    |                                    |
| <i>APOC1</i>             | Apolipoprotein C-I                                 | Lipid metabolism                   |
| <i>AC004241.3</i>        | Uncharacterized protein                            | Unknown                            |
| <i>NMNAT3</i>            | Nicotinamide nucleotide adenylyltransferase 3      | NAD <sup>+</sup> biosynthesis      |
| <i>FBP1</i>              | Fructose-1,6-bisphosphatase 1                      | Glycolysis/gluconeogenesis         |
| <i>PMEPA1</i>            | Prostate transmembrane protein, androgen-induced 1 | Transcription regulation           |
| <i>TAF15</i>             | TATA-box binding protein-associated factor 15      | RNA splicing                       |
| <i>APOE</i>              | Apolipoprotein E                                   | Lipid metabolism                   |
| <i>MTURN</i>             | Uncharacterized protein                            | Unknown                            |
| <i>MIDIIP1</i>           | Mid1-interacting protein 1                         | Microtubule organization           |
| <i>WBP4</i>              | WW domain-binding protein 4                        | RNA binding                        |
| <i>MZT2B</i>             | Mitotic-spindle organizing protein 2B              | Mitosis                            |
| <i>SNHG8</i>             | Small nucleolar RNA host gene 8                    | Unknown                            |
| <i>RPS15</i>             | 40S ribosomal protein S15                          | Translation                        |
| <i>RPL18</i>             | 60S ribosomal protein L18                          | Translation                        |
| <i>RPL37A</i>            | 60S ribosomal protein L37a                         | Translation                        |
| <i>PDLIM7</i>            | PDZ and LIM domain protein 7                       | Cytoskeleton organization          |
| <i>MMP7</i>              | Matrix metalloproteinase-7                         | Extracellular matrix remodeling    |
| <i>RPS19</i>             | 40S ribosomal protein S19                          | Translation                        |
| <i>RPL37</i>             | 60S ribosomal protein L37                          | Translation                        |
| <i>UQCRH</i>             | Ubiquinol-cytochrome c reductase hinge protein     | Electron transport chain           |
| <i>RNF5</i>              | Ring finger protein 5                              | Protein ubiquitination             |
| <i>STMN1</i>             | Stathmin 1                                         | Microtubule organization           |
| <i>CNPY3</i>             | Canopy FGF signaling regulator 3                   | Protein folding                    |
| <i>CALM2</i>             | Calmodulin 2                                       | Calcium binding                    |
| <i>H3F3A</i>             | H3 histone family member 3A                        | Histone variant                    |

| Downregulated genes |                                                         |                           |
|---------------------|---------------------------------------------------------|---------------------------|
| <i>NCKAP1L</i>      | NCK-associated protein 1-like                           | Cytoskeleton organization |
| <i>APLP2</i>        | Amyloid beta precursor protein-like protein 2           | Neurotransmission         |
| <i>CANX</i>         | Calnexin                                                | Protein folding           |
| <i>TM9SF3</i>       | Transmembrane 9 superfamily member 3                    | Vesicular trafficking     |
| <i>DCTN1</i>        | Dynactin subunit 1                                      | Intracellular transport   |
| <i>SEC61A1</i>      | Sec61 translocon alpha subunit                          | Protein translocation     |
| <i>EMP1</i>         | Epithelial membrane protein 1                           | Cell adhesion             |
| <i>HM13</i>         | Hydroxymethylbilane synthase                            | Heme biosynthesis         |
| <i>MCL1</i>         | Myeloid cell leukemia 1                                 | Apoptosis regulation      |
| <i>C5AR1</i>        | Complement component 5a receptor 1                      | Immune response           |
| <i>ARHGAP26</i>     | Rho GTPase-activating protein 26                        | Cytoskeleton organization |
| <i>QSOX1</i>        | Quiescin sulfhydryl oxidase 1                           | Protein folding           |
| <i>YIPF6</i>        | Yip1 domain family member 6                             | Golgi vesicle trafficking |
| <i>MRTFB</i>        | Myocardin-related transcription factor B                | Transcription regulation  |
| <i>EHMT2</i>        | Euchromatic histone-lysine N-methyltransferase 2        | Histone methylation       |
| <i>HYOU1</i>        | Hypoxia upregulated 1                                   | Protein folding           |
| <i>HNRNPF</i>       | Heterogeneous nuclear ribonucleoprotein F               | RNA splicing              |
| <i>RAB7B</i>        | Ras-related protein Rab-7b                              | Intracellular transport   |
| <i>LACC1</i>        | Laccase-like protein 1                                  | Unknown                   |
| <i>NDRG1</i>        | N-Myc downstream regulated 1                            | Cell cycle regulation     |
| <i>LARP4</i>        | La ribonucleoprotein domain family member 4             | mRNA translation          |
| <i>SACM1L</i>       | SAC1 suppressor of actin mutations 1-like               | Phospholipid metabolism   |
| <i>PLEKHO2</i>      | Pleckstrin homology domain-containing family O member 2 | Signal transduction       |
| <i>ZNF35</i>        | Zinc finger protein 35                                  | Transcription regulation  |
| <i>THBD</i>         | Thrombomodulin                                          | Blood coagulation         |
| <i>SLC16A6</i>      | Monocarboxylate transporter 6                           | Metabolite transport      |

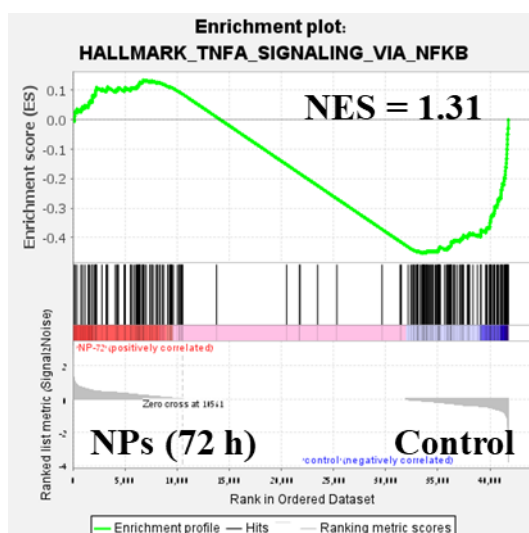

**Figure S2.** GSEA enrichment plots of the correlation of hGM-g-PMMA30 NPs (0.1% w/v, 72 h) treatment with TNF- $\alpha$ -signaling pathway via NfKb, NES value is applied in the plot.

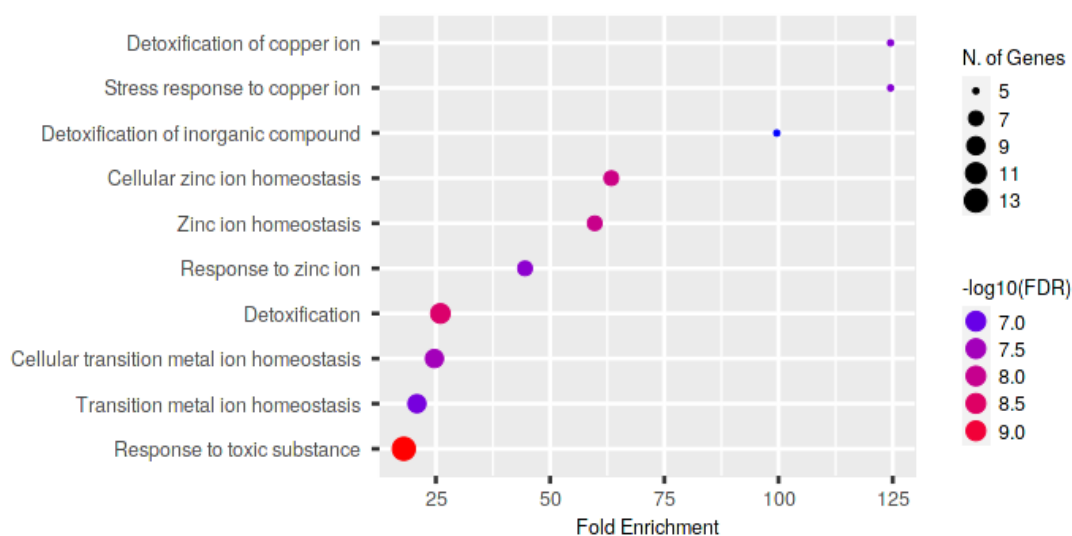

**Figure S3.** GO enrichment analysis of all significantly upregulated genes found in the RNA-seq data upon 24-h exposure to 0.1% w/v hGM-g-PMM30 NPs.

## References

[1] A. Zaritski, H. Castillo-Ecija, M. Kumarasamy, E. Peled, R. Sverdlov Arzi, Á.M. Carcaboso, A. Sosnik. Selective accumulation of galactomannan amphiphilic nanomaterials in pediatric solid tumor xenografts correlates with GLUT1 gene expression. *ACS Appl. Mater. Interfaces* 11 (2019) 38483–38496. <https://doi.org/10.1021/acsami.9b12682>

- [2] E. Peled, A. Sosnik. Amphiphilic galactomannan nanoparticles trigger the alternative activation of murine macrophages. *J. Control. Release* 339 (2021) 473–483. <https://doi.org/10.1016/j.jconrel.2021.10.017>
- [3] C. Trapnell, A. Roberts, L. Goff, G. Pertea, D. Kim, D.R. Kelley, H. Pimentel, S.L. Salzberg, J.L. Rinn, L. Pachter. Differential gene and transcript expression analysis of RNA-seq experiments with TopHat and Cufflinks. *Nat. Protoc.* 7 (2012), 562–578. doi: <https://doi.org/10.1038/nprot.2012.016>
- [4] L.M Campbell, P.J. Maxwell, D.J.J. Waugh. Rationale and means to target pro-Inflammatory interleukin-8 (CXCL8) signaling in cancer. *Pharmaceuticals* 6 (2013) 929–959. <https://doi.org/10.3390/ph6080929>
- [5] M.I. Love, W. Huber, S. Anders. Moderated estimation of fold change and dispersion for RNA-seq data with DESeq2. *Genome. Biol.* 15 (2014) 550. <https://doi.org/10.1186/s13059-014-0550-8>
- [6] A. Subramanian, P. Tamayo, V.K. Mootha, S. Mukherjee, B.L. Ebert, M.A. Gillette, A. Paulovich, S.L. Pomeroy, T.R. Golub, E.S. Lander, J.P. Mesirov. Gene set enrichment analysis: A knowledge-based approach for interpreting genome-wide expression profiles. *Proc. Natl. Acad. Sci. U.S.A.* 102 (2005) 15545–15550. <https://doi.org/10.1073/pnas.0506580102>
- [7] A. Liberzon, A. Subramanian, R. Pinchback, H. Thorvaldsdóttir, P. Tamayo, J.P. Mesirov. Molecular signatures database (MSigDB) 3.0. *Bioinformatics* 27 (2011) 1739–1740. <https://doi.org/10.1093/bioinformatics/btr260>
- [8] A. Liberzon, C. Birger, H. Thorvaldsdóttir, M. Ghandi, J.P. Mesirov, P. Tamayo. The molecular signatures database Hallmark gene set collection. *Cell Syst.* 1 (2015) 417–425. <https://doi.org/10.1016/j.cels.2015.12.004>
